# Supplementary material for: Co3O4 nanowires supported on 3D N-doped carbon foam as an electrochemical sensing platform for efficient H2O2 detection
Source: Royal Society of Chemistry journal article supplement (doi:10.1039/c4nr03043e), 2014-01-01
Supplement: c4nr03043e1.pdf [file c4nr03043e1.pdf]

Electronic Supplementary Information

**Co<sub>3</sub>O<sub>4</sub> Nanowires Supported on 3D N-Doped Carbon Foam as  
Electrochemical Sensing Platform for Efficient H<sub>2</sub>O<sub>2</sub> Detection**

Minmin Liu<sup>a,b</sup>, and Wei Chen<sup>a\*</sup>

<sup>a</sup> *State Key Laboratory of Electroanalytical Chemistry, Changchun Institute of Applied Chemistry, Chinese Academy of Sciences, Changchun, Jilin 130022, China*

<sup>b</sup> *University of the Chinese Academy of Sciences, Beijing 100039, China*

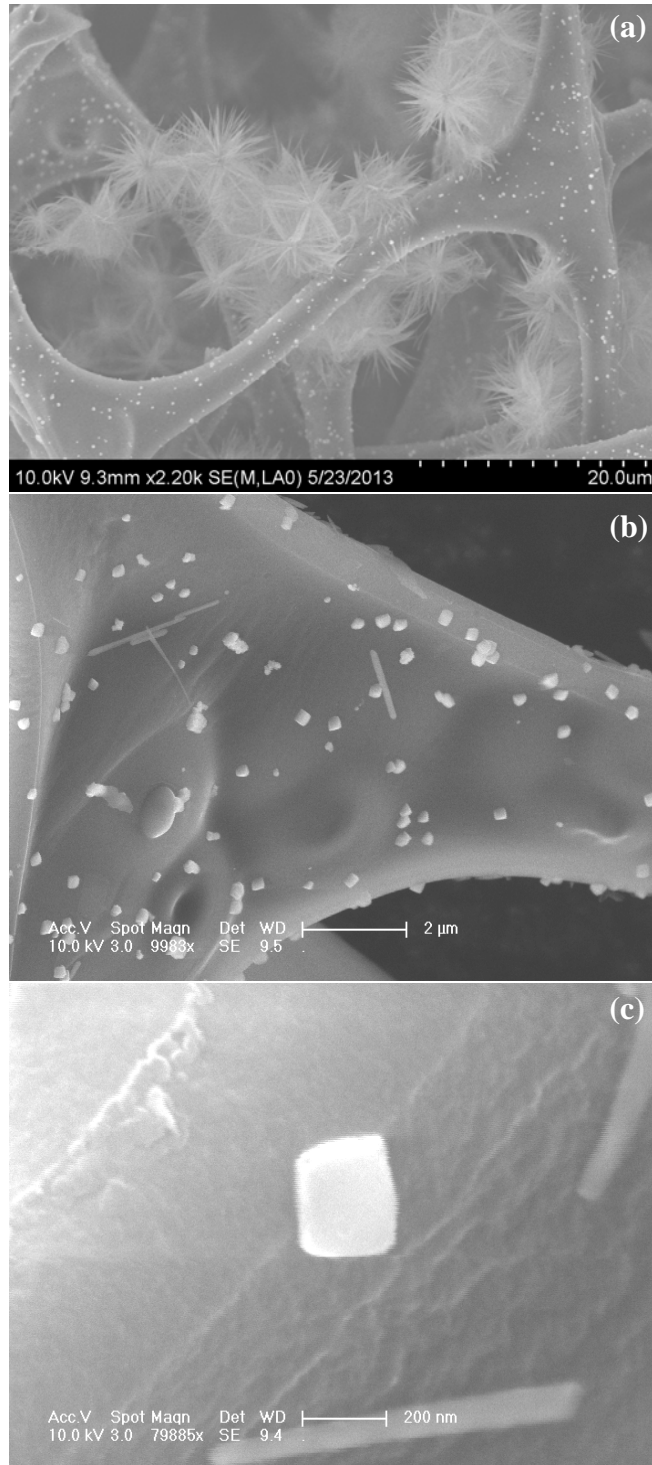

**Fig. S1** SEM images of  $\text{Co}_3\text{O}_4$ -NWs/CF-0.5 composite at different magnifications.

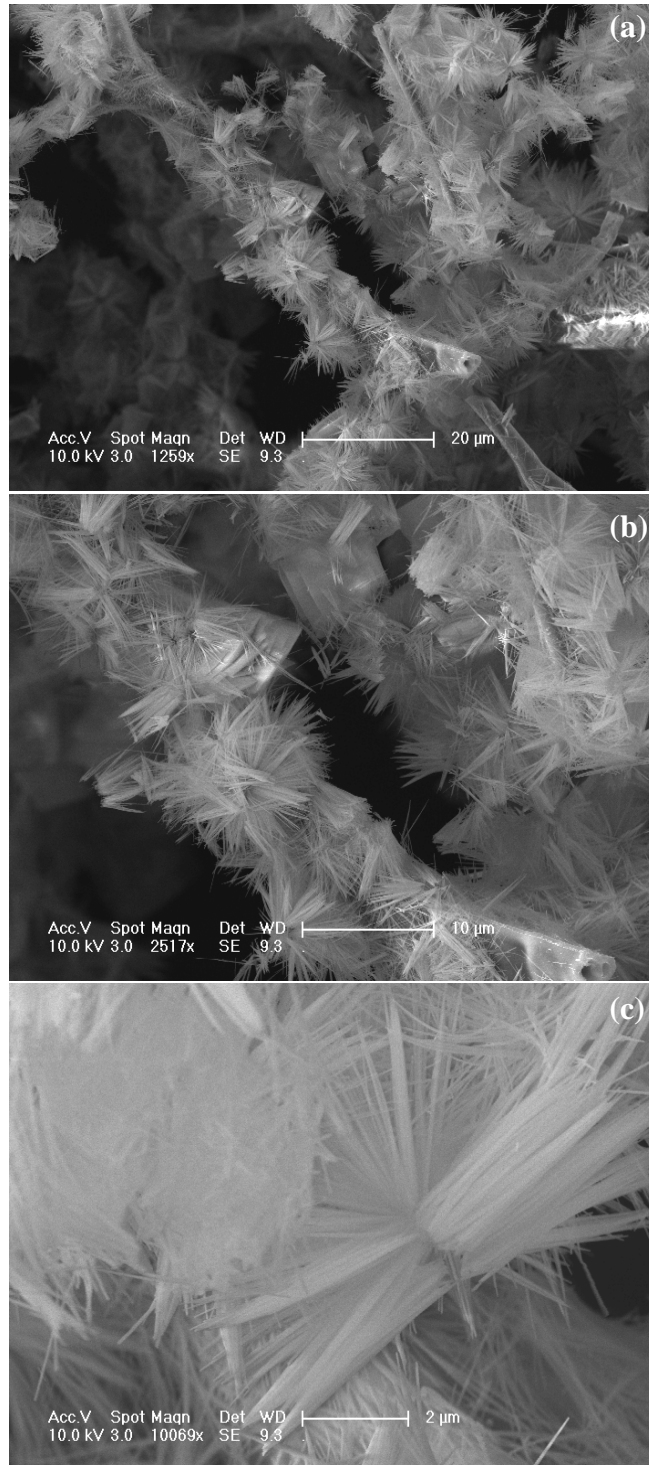

**Fig. S2** SEM images of  $\text{Co}_3\text{O}_4$ -NWs/CF-2 composite at different magnifications.

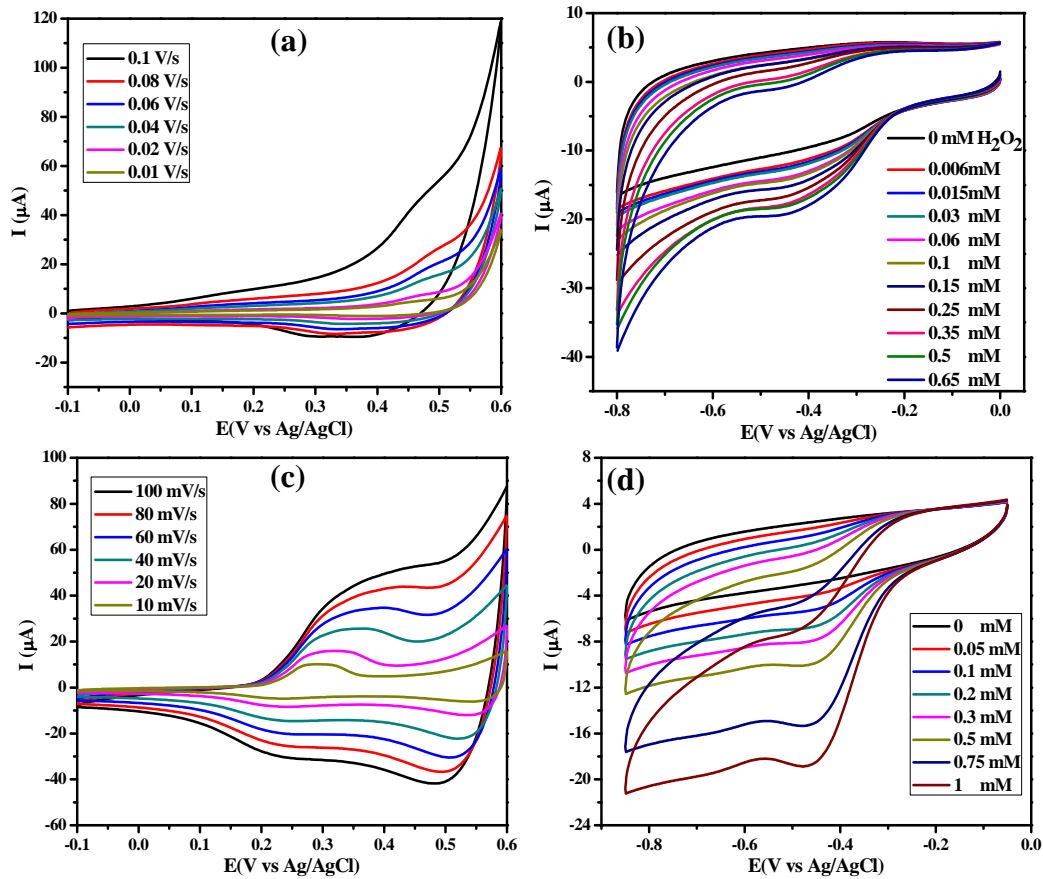

**Fig. S3** Cyclic voltammograms of  $\text{Co}_3\text{O}_4\text{-NWs/CF-0.5}$  (a) and  $\text{Co}_3\text{O}_4\text{-NWs/CF-2}$  (c) recorded in 0.1 M KOH solution at different potential scan rates from 10 to 100 mV/s. Cyclic voltammograms of  $\text{Co}_3\text{O}_4\text{-NWs/CF-0.5}$  (b) and  $\text{Co}_3\text{O}_4\text{-NWs/CF-2}$  (d) in 0.1 M KOH solution with different concentrations of  $\text{H}_2\text{O}_2$ , potential scan rate 0.1 V/s.

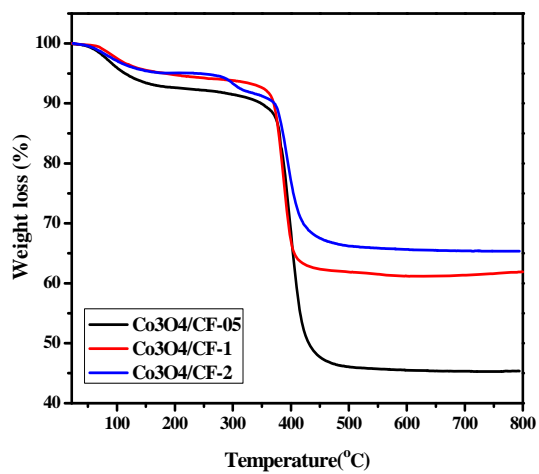

**Fig. S4** TGA curves of  $\text{Co}_3\text{O}_4/\text{CF}$  composites measured from 25 to 800 °C at a heating rate of 10 °C/min in air.
